# Supplementary material for: Overcoming Microenvironment-Mediated Chemoprotection through Stromal Galectin-3 Inhibition in Acute Lymphoblastic Leukemia
Source: MDPI journal article supplement (doi:10.3390/ijms222212167), 2021-11-10
Supplement: s1 [file s1]

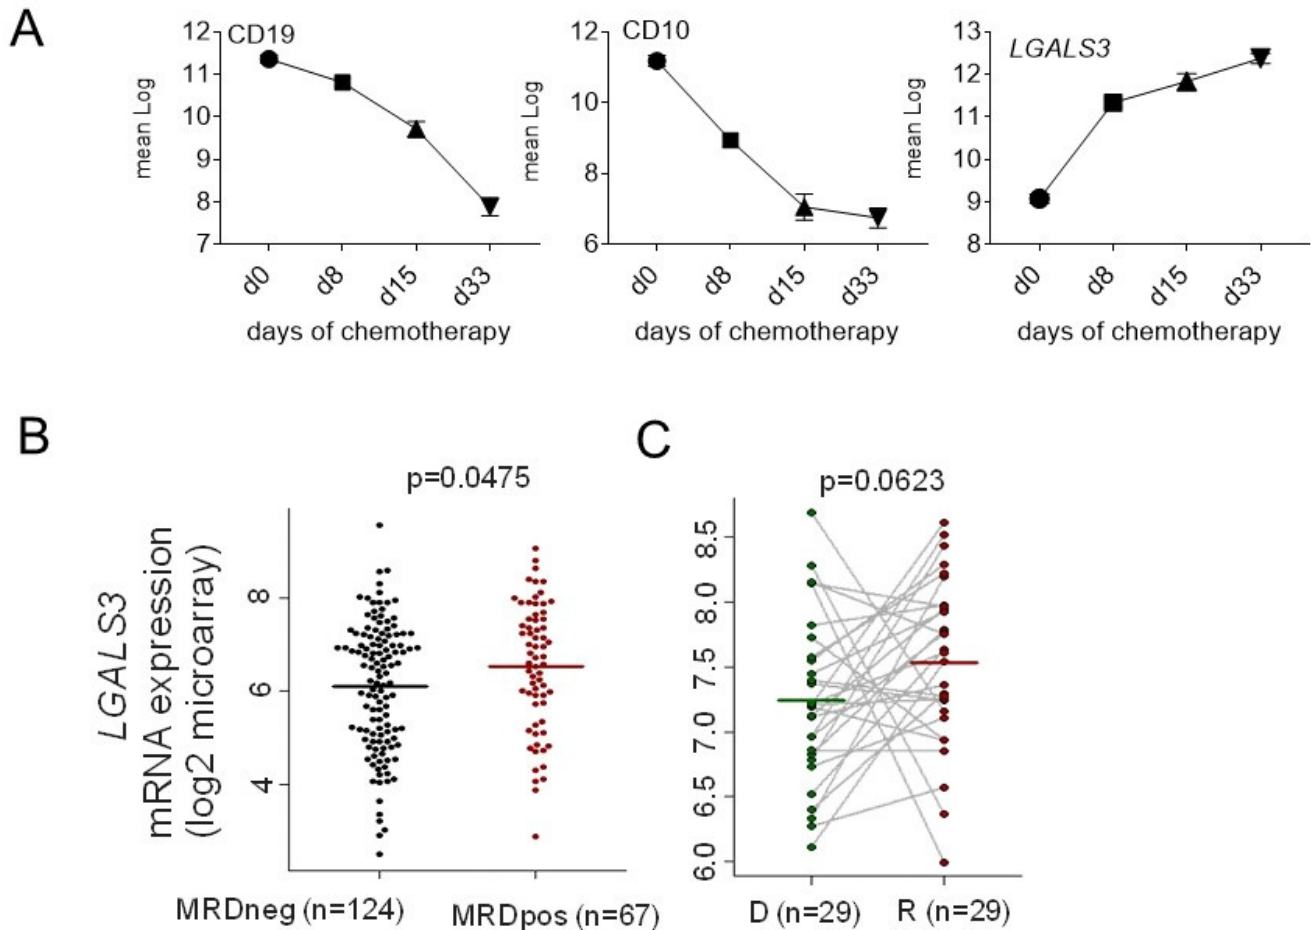

**Figure S1. High levels of *LGALS3* mRNA in pediatric BCP-ALL.** (A) Mean log-transformed normalized GEP values for the indicated genes on 220 pediatric de novo ALL at diagnosis, day 8, day 15, and day 33 of remission-induction therapy (23) (GSE67684). (B) *LGALS3* expression for probe set 1557197\_a\_at in the indicated samples [gene microarrays, log2 expression, COG P9906, GSE11877]. p-value, two-sided Wilcoxon test. (C). *LGALS3* in paired early (<36 months) relapse and diagnosis pediatric ALL samples (Gene microarray array expression (log2) COG P9906 GSE28460). p-values, paired two-sided Wilcoxon test.

# Tarighat et al. Overcoming microenvironment-mediated chemoprotection through stromal galectin-3 inhibition in acute lymphoblastic leukemia

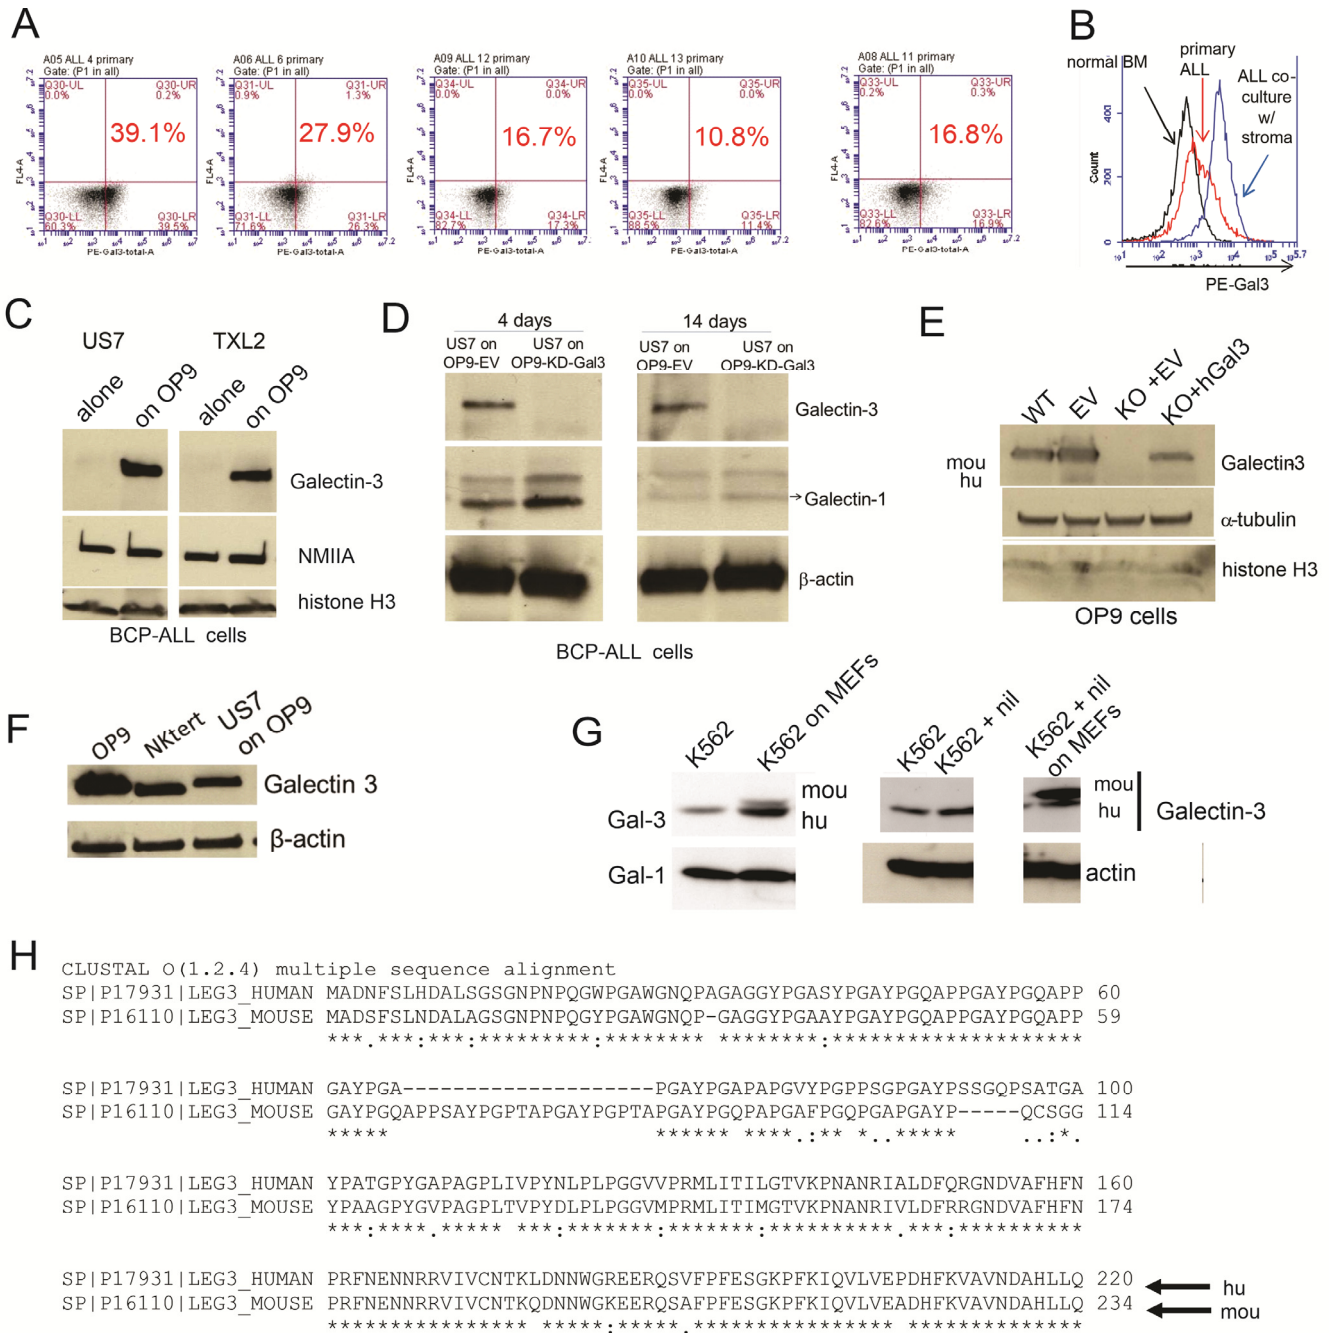

**Figure S2. Endogenous galectin-3 expressed in BCP-ALLs in comparison to stromal-produced galectin-3.**

(A) Total Gal3 expression in 5 different primary BM BCP-ALL samples using PE-Gal3 antibodies. Ficoll-purified mononuclear cells viably frozen in LN<sub>2</sub> were thawed, washed and kept for 3 hrs in  $\alpha$ -MEM before fixation / permeabilization. Red numbers, % of Gal3-positive cells based on gating set by control IgG. (B) FACS histogram of total Gal3 expression in primary leukemia sample #11 (Ph-, >90% CD10/CD19+) on day 0 and after ~10 days co-culture with irradiated OP9 stroma cells, compared to normal bone marrow on day 0. (C) Western blot of human US7 or TXL2 BCP-ALL cells that had been kept in medium without OP9 stromal cells ('alone') or co-cultured with OP9 wild type stromal cells. (D) Western blot of US7 cells co-cultured with OP9 –



**Tarighat et al. Overcoming microenvironment-mediated chemoprotection through stromal galectin-3 inhibition in acute lymphoblastic leukemia**

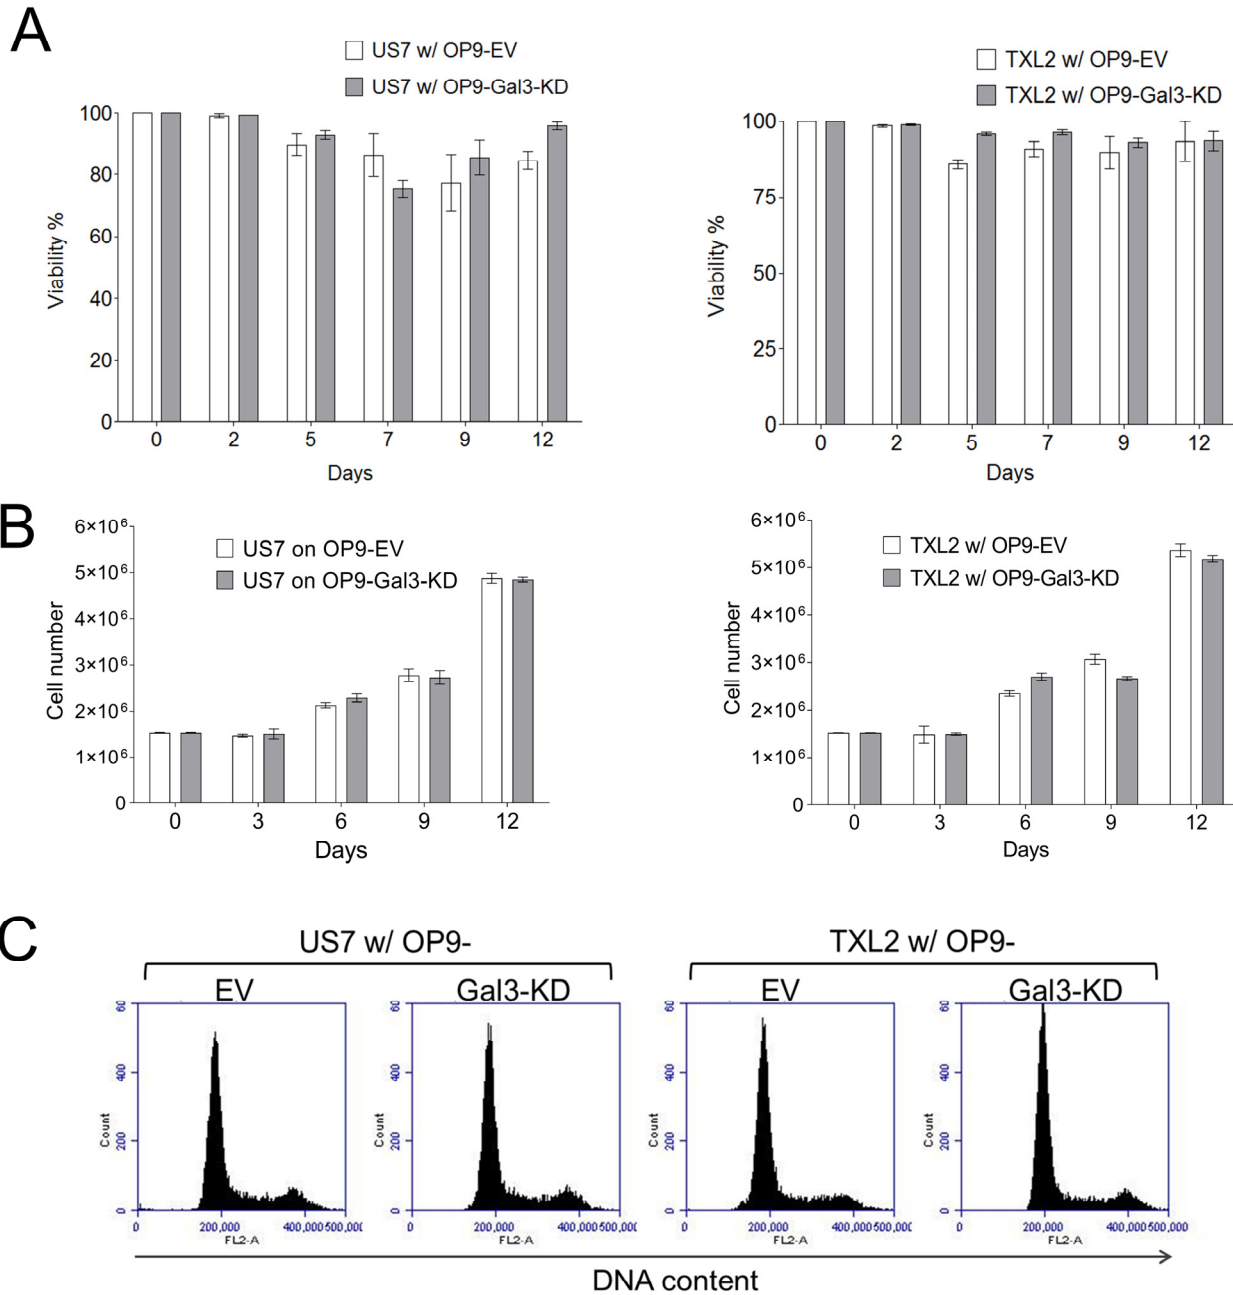

**Figure S4. Under steady-state growth, galectin-3 produced by stromal cells is not essential. (A)** Viability and **(B)** cell counts of US7 [left] and TXL2 [right] cells measured by Trypan blue exclusion grown over 12 days on the indicated OP9 stromal cells. **(C)** Cell cycle analyzed by FACS and DNA content at different phases of the cell cycle in US7 or TXL2 cells grown for more than 4 days in co-culture with the indicated OP9 cells.

# Tarighat et al. Overcoming microenvironment-mediated chemoprotection through stromal galectin-3 inhibition in acute lymphoblastic leukemia

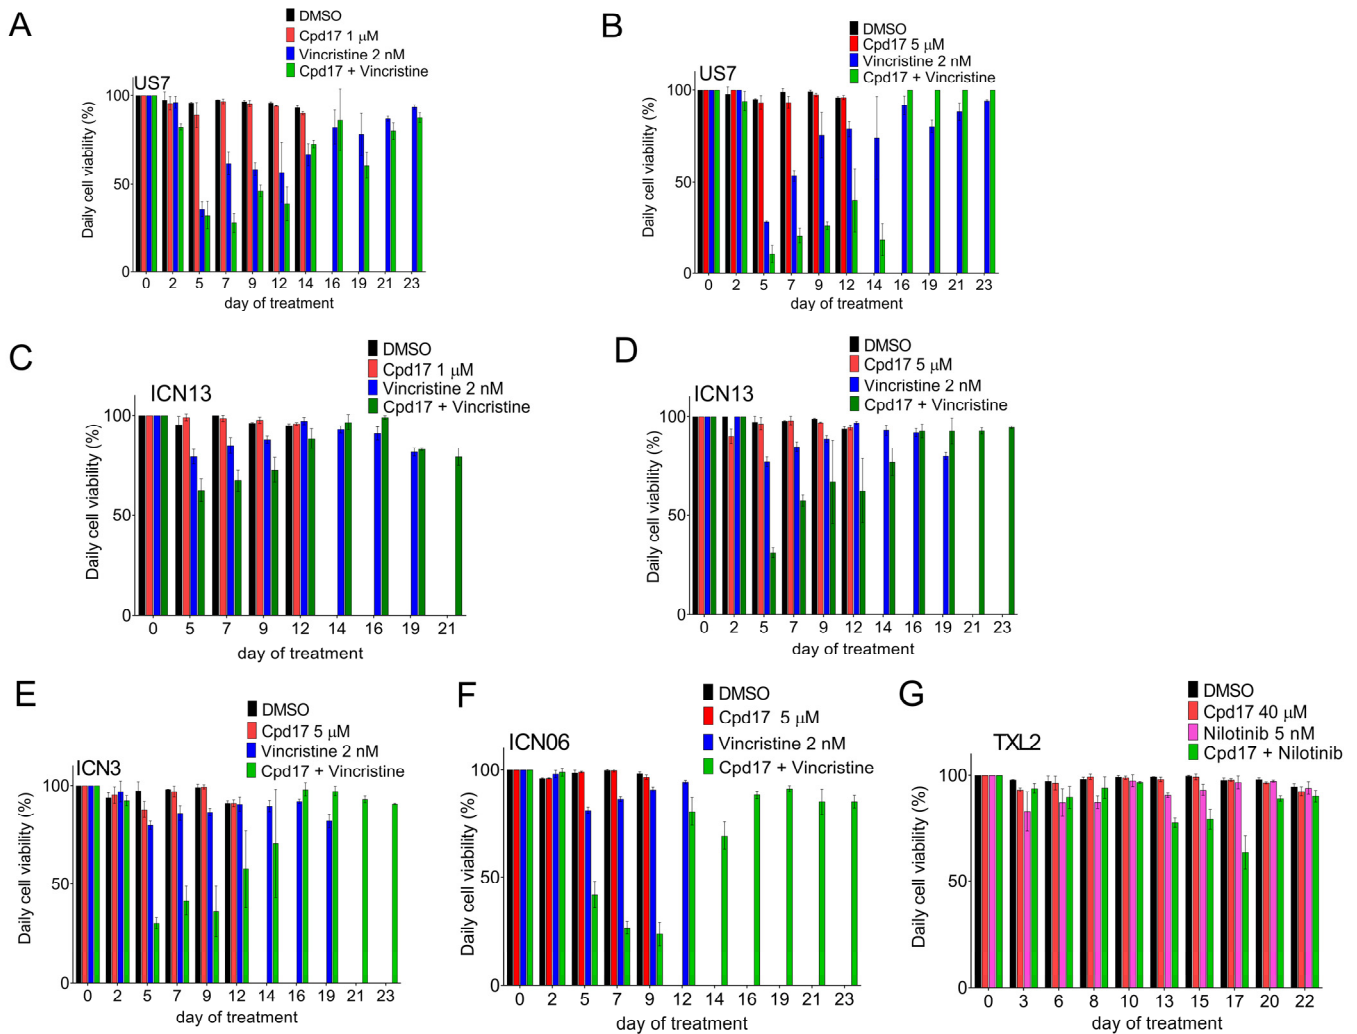

**Figure S5. Viability of BCP-ALLs treated with combination treatment including Cpd17.** Samples (Fig. 8) were treated with solvent DMSO [black bars], Cpd17 [red bars], standard chemotherapy [blue bars] or a combination of chemotherapy with Cpd17, [green bars]. DMSO only, Cpd17 mono-treatment and vincristine mono-treatment samples were not followed after a certain period when cell numbers exceeded the capacity of the wells and cultures became overgrown in A-F. Viability = viable cell count/total cell count x 100%. This is a measurement for the Trypan-blue excluding [living] status of cells that remain in the culture, even if they are only very few in number. Error bars, mean  $\pm$  SEM of 2-4 wells. Fresh drugs at the same concentration were added with every medium change. However, in panel G, Cpd17 was administered at 10  $\mu$ M on day 0, increased to 20  $\mu$ M on day 6 and further increased to 40  $\mu$ M on day 10 because drug combination effects were minimal at 10 and 20  $\mu$ M.

A-F: 2 nM vincristine as standard chemotherapy;  
 G: 5 nM targeted tyrosine kinase inhibitor nilotinib.  
 A-B: US7 cells; C-D: ICN13; E: ICN3; F: ICN06; G: TXL2.  
 A, C: 1  $\mu$ M Cpd17.  
 B, D-F: 5  $\mu$ M Cpd17.  
 G: 40  $\mu$ M Cpd17 from d10 onwards.
